# Supplementary figures and images for: MicroRNAs Expression in Response to rhNGF in Epithelial Corneal Cells: Focus on Neurotrophin Signaling Pathway
Source: MDPI journal article supplement (doi:10.3390/ijms23073597), 2022-03-25

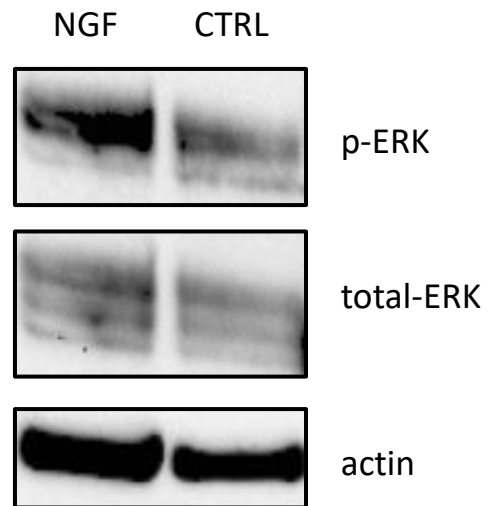

Figure S1: p-ERK induction after rhNGF treatment (30 min)

Supplement: s1 [file s1]
